# 1 **Integration of chemosensing and carbon catabolite repression** 2 **impacts fungal enzyme regulation and plant associations**

3  
4 Wolfgang Hinterdobler<sup>1</sup>, Guofen Li<sup>1</sup>, David Turra<sup>2,a</sup>, Miriam Schalamun<sup>1</sup>, Stefanie Kindel<sup>1</sup>, Ursula Sauer<sup>1</sup>,  
5 Sabrina Beier<sup>1</sup>, Aroa Rodriguez Iglesias<sup>1</sup>, Stéphane Compant<sup>1</sup>, Stefania Vitale<sup>2</sup>, Antonio Di Pietro<sup>2</sup> and  
6 Monika Schmoll<sup>1\*</sup>

7  
8 <sup>1</sup> *AIT Austrian Institute of Technology, Center for Health and Bioresources, Tulln, Austria*

9 <sup>2</sup> *Departamento de Genetica, Campus de Excelencia Internacional Agroalimentario ceiA3, Universidad de*  
10 *Cordoba, Cordoba, Spain*

11  
12 <sup>a</sup> Current address: Department of Agricultural Sciences, University of Naples Federico II, Portici, Italy.

13 Running title: Nutrient and plant sensing in *T. reesei*

14  
15 Keywords: *Trichoderma reesei*, chemotropism, plant sensing, sexual development, carbon catabolite  
16 repression, glucose sensing, G protein-coupled receptor, heterotrimeric G protein pathway, cAMP

17  
18 \* Corresponding author

19 Tel: +43 664 88390594

20 Email:  
21 Wolfgang Hinterdobler      wolfgang.hinterdobler@ait.ac.at  
22 Guofen Li                      guofen.li@ait.ac.at  
23 David Turra                    davturra@unina.it  
24 Miriam Schalamun            miriam.schalamun@ait.ac.at  
25 Stefanie Kindel              stefanie.33@hotmail.com  
26 Ursula Sauer                ursula.sauer@ait.ac.at  
27 Sabrina Beier                sabrina.beier@ait.ac.at  
28 Aroa Rodriguez-Iglesias    aroa.riguez.iglesias@gmail.com  
29 Stéphane Compant          stephane.compant@ait.ac.at  
30 Stefania Vitale              stefy.vitale@libero.it  
31 Antonio Di Pietro          ge2dipia@uco.es  
32 Monika Schmoll              monika.schmoll@ait.ac.at

33 **Abstract**

34

35 Fungal metabolism and enzyme production are regulated by nutrient availability and by interactions with  
36 the living environment. We investigated the mechanisms underpinning adaptation of the biotechnological  
37 fungus *Trichoderma reesei* to decaying plant biomass versus living plants. We found that concentration-  
38 gated response to glucose, the main molecule sensed from dead plant biomass, is mediated by a conserved  
39 signaling pathway downstream of G protein-coupled receptors (GPCRs), while the carbon catabolite  
40 repressor CRE1 is critical for glucose concentration gating. The GPCRs CSG1 and CSG2 are further  
41 required for root colonization and formation of appressorium like structures on plant surfaces. Acceleration  
42 of sexual development in the presence of plant roots and their interactions with fruiting bodies indicates  
43 preferential association with plants. Our results reveal a complex sensing network governing resource  
44 distribution, enzyme production and fungal development that explains previously observed phenomena in  
45 fermentations and opens new perspectives for industrial strain improvement and agriculture.

## 46 **Introduction**

47

48 Sensing of the environment is crucial for all living organisms – be it in their natural habitat or in an industrial  
49 setting. Fungi are efficient degraders of plant biomass, and some can also act as root symbionts of living  
50 plants by sharing critical nutrients and extending the plant's acquisition network (1-3). The ability to  
51 distinguish dead plant material that needs to be enzymatically degraded from a living plant that serves as a  
52 mutualistic association partner, is essential to activate the appropriate metabolic and developmental  
53 responses during the interaction.

54 Fungi of the genus *Trichoderma* are ideal models for transfer of natural phenomena to industrial application  
55 by studying complex interspecies relationships, as they can act both as saprophytic biomass degraders and  
56 plant symbionts (4, 5). *Trichoderma reesei* (6, 7) is mostly known as an efficient degrader of cellulosic plant  
57 material in nature (8). However, this species was also shown to protect plants against a soil borne oomycete  
58 pathogen (9), suggesting that it can undergo beneficial associations with plant roots. Moreover, *T. reesei* is  
59 the only member of the genus in which sexual development has been achieved under laboratory conditions  
60 (10), which is significantly regulated by pheromone sensing and external cues (11) and of considerable  
61 biotechnological importance for strain improvement (11, 12).

62 Fungi can utilize insoluble plant biomass as a source of nutrients by secreting an array of cell wall degrading  
63 enzymes (CWDEs) (13). Regulation of CWDE expression in *T. reesei* has been studied in detail (4, 14).  
64 The disaccharide sophorose is thought to act as a natural inducer of cellulolytic enzymes (15, 16). However,  
65 in the presence of easily metabolized carbon sources such as glucose, CWDE synthesis is inhibited through  
66 the carbon catabolite repressor CRE1 (17, 18). Furthermore, regulation of cellulase genes in *T. reesei*  
67 requires conserved components of the heterotrimeric G protein/cAMP pathway, including the G protein  
68 alpha subunits GNA1 and GNA3, the G protein beta and gamma subunits GNB1 and GNG1, as well as the  
69 phosphatidylinositol 3-kinase like protein PhLP1 (19-23). Recently, two class XIII G protein-coupled receptors (GPCRs),  
70 CSG1 and CSG2, were shown to be required for cellulase expression, and CSG1 was also implicated in  
71 posttranscriptional regulation of cellulase production (24).

72 Fungal hyphae have the capacity to chemotropically sense and follow a variety of directional cues, allowing  
73 them to successfully locate nutrient sources, mating partners or host organisms (25). Although fungal  
74 chemotropism has been known for more than a hundred years (26), the underlying mechanisms and cell  
75 signaling pathways remain poorly understood (25, 26). Recently, hyphae of the soil-inhabiting plant  
76 pathogen *Fusarium oxysporum* were found to grow towards a variety of carbon and nitrogen sources, as  
77 well as towards host plant signals. The chemotropic response to plants is triggered by class III peroxidases  
78 released by the roots and requires the fungal peptide pheromone receptor Ste2, as well as a mitogen-activated  
79 protein kinase (MAPK) pathway and the NADPH oxidase (NOX) complex (27, 28). While this  
80 groundbreaking discovery provided a first glimpse into the complexity of fungal chemosensing, little is  
81 known so far on chemotropic signaling in other fungi or on signal integration.

82 Here we report the identification of a chemotropic signaling network in *T. reesei*, which is able to precisely  
83 sense glucose concentrations and to accordingly modulate signaling outputs. We further establish that this  
84 mechanism allows the fungus to discriminate between dead plant material and living plants and to activate  
85 the appropriate metabolic and developmental responses, i.e. enzymatic degradation of biomass for nutrient  
86 supply versus root colonization and sexual development.

87

## 88 **Results**

89

### 90 *T. reesei* re-orientes its hyphal growth towards gradients of nutrient sources

91

92 Chemotropic growth towards plant exudates has been reported in *F. oxysporum* (27) and *Trichoderma*  
93 *harzianum* (29). Here we used a previously described plate chemotropism assay to measure chemotropic  
94 sensing in the reference strain QM6a of *T. reesei* (Figure 1a). Because QM6a does not readily germinate in  
95 water agar, 0.0025 % w/v peptone was added to the agar. This concentration was optimized to ensure  
96 coordinated conidial germination above 60 % without interfering with chemotropism. As previously  
97 reported for *F. oxysporum* (27), *T. reesei* exhibited a significant chemotropic response to 1 % (w/v) glucose

98 and 5 % (w/v) sodium glutamate (Figure 1b). These results confirm that the optimized assay conditions are  
99 appropriate for measuring the chemotropic response of *T. reesei* to different carbon and nitrogen sources.

100

101 *Glucose is the main chemoattractant released from plant cell walls*

102

103 CWDE expression in *T. reesei* is tightly regulated to trigger production of the appropriate enzyme cocktail  
104 for degradation of the different cell wall materials (15). We therefore asked whether this fungus can  
105 chemotropically sense building blocks of the plant cell wall. None of the high molecular weight compounds  
106 cellulose, xylan and pectin elicited a significant chemotropic response, most likely due to the insoluble  
107 nature of these polymers (Figure 1c). In line with this idea, cellulose and pectin did induce a significant  
108 chemotropic response after autoclaving (Figure S1a), and this response was abolished when the soluble  
109 compounds released by autoclaving were washed away prior to the chemotropism assay (see below). Hyphal  
110 chemotropism of *T. reesei* is thus elicited by soluble degradation products of cellulose and pectin, as  
111 previously reported in *F. oxysporum* (27).

112 We next measured the chemotropic response of QM6a to different glucose concentrations ranging from  
113 limiting levels (0.0625 % w/v) to very high concentrations (5 %) generating considerable osmotic pressure.  
114 An optimum chemotropic response was detected at 1 % (55 mM) glucose, with a gradual decrease at higher  
115 or lower concentrations (Figure 1d). The bell-shaped dose–response curve is reminiscent of that found in *F.*  
116 *oxysporum* (27) for peptide pheromones (30, 31). Testing of additional *T. reesei* strains confirmed a robust  
117 chemotropic response to glucose with a peak at concentrations between 0.5 and 1 % (Figures S1b and S1c).  
118 We conclude that glucose chemosensing in *T. reesei* is subject to gating, allowing for an optimum  
119 chemotropic response in a limited range (gate) of concentrations.

120 We next tested additional low molecular weight carbon sources released upon plant cell wall degradation or  
121 involved in enzyme regulation, including glycerol, cellobiose or lactose, the transglycosylation product  
122 sophorose, as well as to D-xylose, D-galactose or L-arabinose, all of which act as inducers or repressors of  
123 CWDEs (16, 32). However, none of these compounds elicited a significant chemotropic response when

124 applied at 55 mM, which provided the optimum response for glucose (Figure 1c). Based on these results,  
125 we conclude that glucose is the main soluble compound released from degradable plant material eliciting  
126 chemotropic hyphal growth in *T. reesei*. Nevertheless, these other plant cell wall derived compounds may  
127 still be sensed by the fungus and cause physiological responses other than chemotropism.

128  
129 *Glucose chemosensing requires the GPCRs CSG1/CSG2 and functions via the heterotrimeric G protein-*  
130 *cAMP-PKA pathway*

131  
132 We next asked how chemotropic sensing of glucose is mediated in *T. reesei*. Previous studies suggested that  
133 the two class XIII GPCRs CSG1 and CSG2, which are involved in regulation of cellulase gene expression,  
134 could act as cellulose or glucose-sensors (24). However, the precise function of these GPCRs in glucose  
135 signaling has not been addressed. Here we found that the chemotropic response to all glucose concentrations  
136 tested was largely abolished in the  $\Delta csg1$  and  $\Delta csg2$  single and double mutants (Figure 1e, f). By contrast,  
137 mutants in two other GPCR genes,  $\Delta 4508$  and  $\Delta 80125$ , were unaffected in their response, thus confirming  
138 the specificity of CSG1 and CSG2 in glucose chemosensing (Figure S1d) and that the *hph* selection marker  
139 does not interfere with chemotropic responses. Similar to the wild type strain, the  $\Delta csg1$  and  $\Delta csg2$  mutants  
140 failed to show a significant response to the other low molecular weight carbon sources tested (Figure S2).  
141 Collectively, these findings suggest that CSG1 and CSG2 have essential and non-redundant roles in  
142 chemotropic sensing of glucose. This is in line with previous results showing that loss of CSG1 or CSG2  
143 has differential impacts on cellulase regulation (24).

144 Heterotrimeric G protein subunits (19-21) as well as adenylate cyclase ACY1 and protein kinase A (22)  
145 were previously shown to function in cellulase regulation (Figure 2a). Here we found that the chemotropic  
146 response to 1 % glucose was abolished in *T. reesei* deletion mutants lacking either the G alpha subunits  
147 GNA1, GNA2, or GNA3, the G beta subunit GNB1, the G gamma subunit GNG1, the phosphatidylinositol 3-kinase PhLP1,  
148 the catalytic subunit of protein kinase A, PKAc1, or the adenylate cyclase ACY1 (Figure 2 a, b).  
149 Interestingly, constitutive activation of GNA1 and GNA3 (19, 20) , but not of GNA2, also abolished the

150 chemotropic response to glucose (Figure 2c). We conclude that the heterotrimeric G protein-cAMP pathway  
151 plays a key role in concentration dependent glucose chemosensing of *T. reesei* and that fine-tuned activation  
152 levels of the G alpha subunits GNA1 and GNA3 are required for this response.

153  
154 *CSG1/CSG2 and the G-protein-cAMP-PKA pathway are also required for chemosensing of plant roots*

155  
156 Although *T. reesei* is mostly known as an efficient degrader of dead plant material (8), this fungus has been  
157 suggested to undergo beneficial associations with plant roots (9). We therefore asked whether *T. reesei* is  
158 able to chemotropically sense the presence of the living plant. In the plant pathogen *F. oxysporum*,  
159 chemotropic growth towards roots is triggered by secreted class III plant peroxidases and requires the GPCR  
160 Ste2, the cognate receptors of peptide sex pheromone alpha (27, 30). Here we found that similar to *F.*  
161 *oxysporum*, *T. reesei* exhibited a significant chemotropic response to root exudates from soybean or tomato  
162 plants (Figure 2d), as well as a concentration dependent response to commercial horse radish peroxidase  
163 (HRP) with a peak at 8  $\mu$ M (Figure 2e). Both responses required the GPCR orthologues of Ste2 and Ste3,  
164 which are named HPR1 and HPR2 in *T. reesei* (Figure 2f). Importantly, HPR1 and HPR2 were also required  
165 for chemotropism of *T. reesei* towards peptide sex pheromones  $\alpha$  and  $\alpha'$ , respectively (supplementary  
166 note 1, Figure S3), mimicking the results from *F. oxysporum*. Thus, the dual role of the pheromone receptors  
167 in chemosensing of mating pheromones and plant peroxidases is conserved between the two fungal species,  
168 reinforcing the functional link between sexual development and plant recognition in fungi.

169 We next asked whether, in addition to their role in glucose chemosensing, the GPCRs CSG1/CSG2 and the  
170 heterotrimeric G protein-cAMP-PKA pathway are also required for chemosensing of living plant roots. In  
171 contrast to the wild type strain, the  $\Delta csg1$  and  $\Delta csg2$  single and double mutants lacked a chemotropic  
172 response to root exudates (Figure 2g). Likewise, mutants in GNA1, GNA2, GNA3, PKAc1 or ACY1 were  
173 impaired in directed growth towards the chemoattractants released from plant roots (Figure 2h). Taken  
174 together, these results indicate that chemosensing of plant signals by *T. reesei* depends on the sex pheromone  
175 receptors as well as on the GPCRs CSG1 and CSG2, which act upstream of the G protein/cAMP pathway.

176 *The carbon catabolite repressor CRE1 determines chemotropic sensitivity to glucose and root exudates*

177

178 Due to the importance of glucose as a signaling molecule released from plant biomass, we next investigated  
179 the role of carbon catabolite repression (CCR), a conserved regulatory mechanism that prevents unnecessary  
180 production of fungal CWDEs in the presence of readily utilizable carbon sources such as glucose (18).  
181 Similar to other fungi, CCR in *T. reesei* is mediated by the conserved carbon catabolite repressor CRE1  
182 (17). Although the chemotropic response to glucose was still functional in a  $\Delta cre1$  mutant, the optimum  
183 response concentration was dramatically shifted to 5 %, as compared to 1 % in the wild type strain (Figure  
184 2i). At a higher concentration of 7.5 %, a decrease in the response was observed, suggesting that  
185 concentration dependence is still functional in the  $\Delta cre1$  mutant. Most importantly, the  $\Delta cre1$  mutant was  
186 also impaired in the response to plant root exudates (Figure 2g). Thus, CRE1-mediated carbon catabolite  
187 repression regulates the sensitivity of chemoperception and impacts gating of the chemotropic response both  
188 to glucose and to plant root exudates.

189

190 *Chemosensing via CSG1/CSG2 impacts hyphal morphology on cellulosic substrate as well as root*  
191 *colonization*

192

193 In nature, nutrient sensing is crucial to induce adaptive responses to the substrate. For example, some  
194 *Trichoderma* spp. differentiate appressorium-like structures during mycoparasitic interaction with other  
195 fungi, thereby facilitating host adhesion and cell wall degradation by lytic enzymes (33, 34). Here we asked  
196 whether chemosensing through CSG1 and CSG2 impacts morphogenetic development of *T. reesei* in  
197 response to dead and living plant substrates. Scanning electron microscopy revealed the presence of  
198 characteristic appressorium-like attachment structures at the tips of the wild type hyphae growing on  
199 surface-sterilized maple leaves (Figure 3a). Similar structures were also observed during growth on  
200 cellophane membranes (Figure S4). However, no such structures were detected in the mutants lacking either  
201 CSG1 or CSG2 (Figure 3a, Figure S4).



202 We next tested the ability of the different strains to colonize living soybean roots. While the wild type strain  
203 of *T. reesei* colonized the roots nearly as efficiently as the well-known biocontrol strain *Trichoderma*  
204 *atroviride* P1 (Figure 3b), the  $\Delta csg1$  or  $\Delta csg2$  mutants largely failed in root colonization (Figure 3c).  
205 Collectively, these results suggest that chemosensing via CSG1/CSG2 not only mediates directed hyphal  
206 growth of *T. reesei* towards nutrient sources and plant roots but is also required for the differentiation of  
207 specialized adhesion structures on natural cellulosic substrates and for efficient colonization of living plant  
208 roots.

209

210 *Plant roots stimulate sexual development of T. reesei*

211

212 Because nutrient availability is crucial for efficient sexual development (35), we wondered whether glucose  
213 sensing by CSG1/CSG2 impacts sexual development and/or chemical communication by secretion of  
214 secondary metabolites(36) prior to mating. Here we found that the mating behavior of the mutants lacking  
215 CSG1 and/or CSG2 was not significantly changed compared to wild type and that both showed altered  
216 profiles compared to wild-type with  $\Delta csg2$  producing lower levels of sorbicillin derivatives (yellow  
217 pigments) (Figure S5a-h).

218 Our finding that chemotropic growth of *T. reesei* towards roots requires the Ste2 and Ste3 orthologs HPR1  
219 and HPR2 confirms earlier results showing that chemotropic sensing of the host plant functions via a sex  
220 pheromone receptor (27, 30). We therefore asked whether plant signals impact sexual development of *T.*  
221 *reesei*. To this aim, mating experiments were performed in the absence or presence of soybean seedlings,  
222 using two different combinations of opposing mating types: strains CBS999.97 MAT1-1 x CBS999.97  
223 MAT1-2 and FF1 x FF2, two female fertile derivatives of QM6a. In both mating assays, fruiting body  
224 formation was accelerated by one day in the presence of soybean seedlings (day 6 vs. day 7 in control  
225 conditions) (Figure S5g and Figure S6, 7). This effect was only observed in the physical presence of the  
226 plant, but not when plant root exudates were added to the medium. Moreover, accelerated fruiting body  
227 formation was not mimicked by the presence of a wooden toothpick or a glass rod, suggesting that it is not

228 due to the presence of a physical structure on the plate (supplementary note 2 and Figures S8 and S9). The  
229 fruiting bodies produced in the presence of soybean seedlings were often larger in size and irregular in shape  
230 compared to those produced in the absence of the plant (Figure S6). Similar to the wild type, single mutants  
231 in pheromone receptors also showed accelerated fruiting body formation in the presence of soybean  
232 seedlings (Figure S5g). By contrast, as reported previously, fruiting body formation in a  $\Delta hpr1 \Delta hpr2$  double  
233 receptor mutant was impaired and ascospore formation was abolished in the single receptor mutants of their  
234 cognate mating type (37). These defects were not rescued by the presence of the plant (Figure S7, red  
235 background). We conclude that interaction with the plant stimulates fruiting body formation in *T. reesei* but  
236 cannot substitute for the requirement of the pheromone-receptor interaction.

237

#### 238 *T. reesei* fruiting bodies physically interact with plant roots

239

240 To further explore the effect of the living plant on fungal mating, we conducted microscopic analysis of  
241 fruiting bodies forming on and around plant roots (Figure 4). We noted that these structures were firmly  
242 attached to the root surface and contained morphologically normal perithecia (Figure 4b–n). We further  
243 observed a thickening of the root around the contact zone with the fruiting body and could clearly discern  
244 an interaction zone, where hyphae extended towards the root without extensively penetrating it (Figure 4e,  
245 k, l). In cases where the roots grew across a fruiting body, deformation of both the root and the fruiting body  
246 was observed (Figure 4b, g–k, n), with the root remaining intact for at least 7 days after fruiting body  
247 formation. By contrast, roots which entered a fruiting body without exiting underwent progressive shrinking  
248 and degradation of the root tip inside the fruiting body, with fungal hyphae occupying the resulting cavity  
249 (Figure 4 d,e). Viability staining with methylene blue highlighted a region of the fruiting body mycelium  
250 surrounding the root canal, indicative of a response of the fungal mycelium to the plant (Figure 4e (4)). A  
251 striking response observed was the *de novo* formation of fruiting body tissue in the presence of the root  
252 (Figure 4b, g–i). Roots enclosed inside such a structure displayed signs of degradation, possibly as a result  
253 of plant or fungal defense reactions (Figure 4l–n ). We next asked whether the absence of the fungal

254 pheromone receptor would result in increased damage or growth reduction of the plant roots, but found no  
255 evidence for this (supplementary note 3, Figure S10). We conclude that fruiting bodies of *T. reesei* respond  
256 morphologically to presence of plant roots, which may act both as a carbon source as well as a stimulus for  
257 sexual development (see supplementary note 4).

258

## 259 **Discussion**

260

261 Every single spot in nature is teeming with life, with diverse organisms competing or living in synergy. The  
262 natural habitat of *Trichoderma* are forests, where decaying plant material coexists with living plants (1). In  
263 this complex environment, the fungus must adapt its lifestyle to different necessities. Here we provide  
264 evidence showing that *T. reesei* integrates chemosensing of glucose monomers released from cellulosic  
265 plant biomass with signals from living plants, via the GPCRs CSG1/CSG2 and the conserved heterotrimeric  
266 G protein-cAMP-PKA signaling cascade, to efficiently adjust its responses to the surrounding nutritional  
267 and “social” landscape. To achieve this adaptation, our data indicate that *T. reesei* uses feedback cycles of  
268 CDWE release, sensing of degradation products such as glucose or sophorose, and subsequent adjustment  
269 of CDWE regulation (Figure 5). While the regulatory mechanisms controlling expression of CWDEs, sexual  
270 development and plant interactions in *Trichoderma* spp. have been studied in detail (4, 5, 11, 14), the  
271 biological relevance and the interconnections between the different pathways have remained elusive.  
272 Previous work indicated that CSG1 is crucial for posttranscriptional regulation of cellulase gene expression  
273 (24), but not for induction of transcription. We show that CSG1 senses a defined concentration of glucose,  
274 and that a specific signal level transmitted through the G-protein cascade is required for the chemotropic  
275 response. Consequently, sensing of this specific glucose concentration must be the signal required for  
276 initiation of enzyme production after transcriptional induction by sophorose and hence represents a second  
277 checkpoint. This explains why constitutive activation of G alpha subunits (19, 20), which, as shown here,  
278 are crucial for glucose signal transmission, does not result in inducer-independent cellulase production:  
279 without transcriptional induction (first checkpoint), glucose levels sensed by this pathway are not relevant.

280 Thus we propose that, in agreement with previous work (24), chemosensing of glucose concentration  
281 represents a crucial checkpoint for efficient utilization of cellulosic substrates and establishment of a  
282 physical interaction with plant roots.

283 We further show that the carbon catabolite repressor CRE1 is important for concentration dependent glucose  
284 sensing. CRE1 transcript levels (38) and nuclear localization (39) were previously shown to be regulated by  
285 glucose concentrations. Our results are in line with previous findings showing that deletion of *cre1* alleviates  
286 the requirement for nutrient limitation to produce high enzyme levels in fermentors (40-42). Reminiscent of  
287 the "gating" found here for the chemotropic response to glucose, cAMP was shown to stimulate cellulase  
288 gene expression in *T. reesei* only at certain concentrations (23). Moreover, in yeasts glucose sensing and  
289 signaling was previously linked to the cAMP-PKA pathway (43, 44). Here we provide further support for  
290 the crucial role of the adenylate cyclase ACY1 and PKAc1, together with CRE1, in concentration dependent  
291 glucose signaling, which is likely to be crucial for improvements towards reliable upscaling of  
292 fermentations.

293 Degradation of dead plant material by fungal CWDEs yields increasing amounts of glucose, which are in  
294 balance with the level of CWDE gene expression. Our results suggest the presence of a negative feedback  
295 mechanism which is controlled via the fine-tuned sensing of glucose levels, in parallel to the detection of  
296 the inducer. This finding is biologically highly relevant, because living plant roots are known to secrete  
297 sugars (45) and exuded glucose could thus act as an inducing signal for root colonization by fungi (46, 47)  
298 in which transmission of nutrients to a fungal interaction partner is tightly regulated and requires contact  
299 (48, 49). Such a chemotropic signaling circuit should act separately from that controlling CWDE production  
300 to allow differentiation between dead litter and living plants acting as a "live nutrient source". We propose  
301 that *T. reesei* distinguishes between live and dead plant material by sensing the balance of secreted CWDEs  
302 and the amount of glucose released by these enzymes. Combined with our findings that root signals are  
303 sensed via two different pathways - the pheromone receptors and the glucose-sensing GPCRs CSG1/2, and  
304 that plant roots stimulate sexual development and interaction with fungal fruiting bodies, we propose that  
305 *T. reesei* applies a bipartite checkpoint mechanism involving glucose sensing via the heterotrimeric G

306 protein pathway and the peroxidase signals detected by sex pheromone receptors. This mechanism is likely  
307 to enable *T. reesei* to optimize resource efficiency by tight regulation of CWDE biosynthesis versus plant  
308 association, which suggests that the latter is a preferable lifestyle for this fungus. This complex sensing  
309 mechanism has a high potential for understanding and improving fungal fermentations, strain improvement  
310 by crossing and exploration of fungal symbiosis or pathogenesis of plants.

311

## 312 **Methods**

313

### 314 *Strains and cultivation conditions*

315

316 For analysis of mating responses, recombinant strains in the fully fertile background of CBS999.97 in both  
317 mating types were used (10, 37). Assessment of chemotropic responses to nutrients were performed with  
318 wild type strains and mutants in the QM6a (6), QM9414 (50), TU-6 (51) or CBS999.97 strain backgrounds,  
319 depending on the mutants used, in order to be able to evaluate the results against the scientific background  
320 on regulation of plant cell wall degradation. Strains FF1 or FF2 (fully fertile derivative strains of QM6a;  
321 mating type MAT1-1 (FF1) or MAT1-2 (FF2)) were used for preparation of double mutants of selected  
322 genes (52). Strains  $\Delta$ 4508 and  $\Delta$ 80125 were constructed as described previously (53) and deletions were  
323 confirmed by PCR with primers binding within the deleted region. *Trichoderma atroviride* P1 (ATCC74508  
324 (54)) was used as a control in the analysis of colonization of soybean roots. A list of the strains and genotypes  
325 used in this study is shown in Table S1.

326 For all chemotropic assays, strains were grown on malt extract agar (3 % w/v) at 28 °C until sporulation (4  
327 days) prior to harvesting of conidia. For sexual development, compatible strains were cultivated on malt  
328 extract agar (2 % w/v) at room temperature in daylight (light-dark cycles) until fruiting body formation and  
329 subsequent ascospore discharge (55). For analysis of the relevance of soybean seedlings for sexual  
330 development, soybeans were surface sterilized, after 3 hours soaking in water, by brief immersion in 70 %  
331 ethanol, 2 minutes in 1.4 % sodium hypochlorite solution and two times washing with sterile water. Seeds

332 were subsequently incubated on malt extract agar plates. Germinating soybeans were placed onto mating  
333 cultures prior to inoculation of fungal mating partners. All chemicals used were supplied by Roth (Karlsruhe,  
334 Germany) unless stated otherwise.

335

#### 336 *Construction of $\Delta csg1$ and $\Delta csg2$ double mutants*

337

338 The mutants  $\Delta csg1$  and  $\Delta csg2$  in the QM6a background (24) were crossed with strain FF1 and ascospores  
339 were harvested. Single spores were isolated and tested for the presence of the mutations by PCR. Mating  
340 types were analyzed as described previously (10). The resulting progeny for both mutants in female fertile  
341 background were crossed to obtain  $\Delta csg1\Delta csg2$  double mutants.

342

#### 343 *Preparation of chemotropic agents and plant root exudates*

344

345 For carbon sources, compounds were dissolved in purified water to the respective concentration and filter  
346 sterilized. Insoluble carbon sources were autoclaved and subsequently washed to remove degradation  
347 products released by autoclaving.

348 For preparation of plant root exudates, soybeans were surface sterilized (as described above) and planted in  
349 sterilized perlite (premium perlite 2–6, Gramoflor GmbH, Germany). Plants were grown until the second  
350 leaf stage and recovered from the perlite. After gentle washing with water, plant roots were carefully  
351 submerged in sterile water and kept for 2 days at room temperature. Root exudates were filter sterilized and  
352 stored at -80 °C.

353

#### 354 *Analysis of chemotropic responses*

355

356 Chemotropism plate assays were done essentially as described (27). Briefly, fresh conidia harvested from  
357 4-day-old plates were resuspended in 1 mL spore solution (0.8 % (w/v) NaCl and 0.05 % (w/v) Tween 80).

358 The suspension was filtered through glass wool, centrifuged at 8000 rpm for 2 minutes, the supernatant was  
359 discarded, and the pellet was resuspended in 1 mL of sterile purified water. The suspension was applied at  
360 a concentration of  $10^8$  conidia per mL to assay plates containing water agar (0.5 % w/v; Roth, Karlsruhe,  
361 Germany No 5210.2). Different concentrations of peptone (from casein; Merck, Darmstadt, Germany; No  
362 1.11931) were added to facilitate germination. The optimal concentration was determined to be 0.0025 %  
363 (w/v) peptone. For the uridine auxotrophic strain TU-6, 10  $\mu$ M uridine was added to the medium, when used  
364 as wild-type control. After application of the chemoattractant and the control solution, plates were incubated  
365 at 28 °C in darkness. After 13 hours of incubation, orientation of germ tubes was determined microscopically  
366 (VisiScope TL524P microscope; 200x magnification) and chemotropic indices were calculated as described  
367 earlier (27).

368

#### 369 *Statistics*

370

371 Statistic evaluation of results was performed using Student's T-Test (two-sided) in R Studio (compare  
372 means, ggpubr v0.3.0). Background in variations of hyphal orientation of wild type strains in the absence  
373 of a chemoattractant was used as control for statistical evaluation (10 biological replicates).

374

#### 375 *Analysis of patterns of secreted metabolites*

376

377 Patterns of secreted metabolites were analyzed by excising agar slices close to the contact zone from plates  
378 with fungi grown under the conditions described. Three biological replicates of three plates pooled each  
379 were used for analysis as described previously by HPTLC (high performance thin layer chromatography)  
380 (56). Briefly, agar slices were extracted with chloroform and acetone, evaporated and resuspended in  
381 chloroform. The samples were spotted on TLC plates (HPTLC silica gel 60 F254s) using the CAMAG  
382 Automatic TLC sampler 4 (CAMAG, Muttenz, Switzerland). After separation, plates were analyzed at  
383 different wave lengths using the CAMAG visualizer (CAMAG).

384 *Analysis of colonization by T. reesei*

385

386 Soybean seeds were surface sterilized and rinsed three times with PBS (phosphate buffered saline, pH7.2).

387 Seeds were then put onto PDA plates containing *T. reesei* strains. Thereafter, the seeds were replaced into

388 sterile magenta boxes containing twice autoclaved soil (1:1:1 perlite, sand, potting soil) and sterilized tap

389 water (25 mL). After 10 days of incubation in the greenhouse, plants were harvested, immersed in PBS (15

390 mL) containing 50 µg/mL of wheat germ agglutinin (WGA)-AlexaFluor488 conjugate (Life Technologies,

391 USA). Plant colonization was analyzed after 2 hours of incubation with (WGA)-Alexa Fluor488 at 37 °C

392 and again rinsing three times with PBS.

393 Microscopy was performed using a confocal microscope (Olympus Fluoview FV1000 with multi-line laser

394 FV5-LAMAR-2 and HeNe(G)laser FV10-LAHEG230-2, Japan) with objectives of 10x, 20x and 40x

395 magnification. X, Y, Z pictures and scans were taken at 405, 488 and 549 nm with same settings and normal

396 light. The software Imaris (Bitplane, Zürich, Switzerland) was used for visualization. ImageJ software

397 (1.47v) was applied to merge pictures from different channels.

398

399 *Electron microscopy of substrate sensing*

400

401 Leafs from *Acer pseudoplatanus* (sycamore maple) were used for analysis of hyphal morphology. Leafs

402 were sterilized with 70 % (v/v) Ethanol and 10 % (v/v) DanKlorix solution (Henkel, Düsseldorf, Germany)

403 washed three times with sterile purified water and dried at 65 °C over night. Electron microscopy was

404 performed at a Hitachi Tabletop Microscope TM330 from a sample area of 5 x 5 mm using a cooling stage

405 in the specimen chamber and freezing at -20 °C in the charge-up reduction mode to minimize distortions of

406 images. At least three areas were investigated per sample in biological duplicates and at least one

407 independent repetition was done with similar results.

408

409



410 **Author contributions**

411  
412 WH contributed to chemotropic analysis, performed microscopy and secondary metabolite analysis,  
413 participated in designing figures, performed statistical analysis of data and contributed to drafting and  
414 editing the manuscript. GL contributed to chemotropic analysis, growth assays and performed confocal  
415 microscopy under the supervision of SC. SC supervised work and designed pictures from confocal  
416 microscopy. SK and US performed electron microscopy. MiS and SB contributed to chemotropic analysis  
417 and SB further supported plant assays. ARI contributed construction of the strain with constitutive activation  
418 of GNA2. SV provided preliminary data and contributed to conception of the study. DT and ADP supervised  
419 part of the work of GL, participated in conception of the study, interpretation and editing of the final  
420 manuscript. MS conceived the study, supervised students, contributed to analysis of results, interpreted data,  
421 designed figures and wrote the final version of the manuscript.

422

423 **Acknowledgements**

424  
425 We want to thank Viktoria Fabsits for technical assistance and Stefan Böhmendorfer (University of Natural  
426 Resources and Life Sciences, Vienna) for the permission to use the HPTLC equipment for secondary  
427 metabolite analysis. Work of WH was supported by the NFB (NÖ Forschungs- und Bildungsges. m. b. H.;  
428 grant LSC16-004 to MS), work of GL, ARI, MiS and SB was supported by the Austrian Science Fund  
429 (FWF, grants P24350, P26935 and P31464 to MS). Work of SK was supported by the FEMtech program  
430 “Talents” of the Austrian Research Promotion agency (FFG). Work of DT was supported by grant BIO2016-  
431 78923-R from the Spanish Ministerio de Economía y Competitividad (MINECO) to ADP. We want to thank  
432 Markku Saloheimo (VTT) for providing the  $\Delta creI$  strain. Soybean samples from organic seed production  
433 were obtained from RWA Austria, Korneuburg, Austria, which is gratefully acknowledged.

434

435

436 **Competing interests**

437 The authors declare no competing interests.

438

439 **REFERENCES**

- 440
- 441 1. Harman GE, Howell CR, Viterbo A, Chet I, & Lorito M (2004) *Trichoderma* species--
- 442 opportunistic, avirulent plant symbionts. *Nat Rev Microbiol* 2(1):43-56.
- 443 2. Mäkelä MR, Donofrio N, & de Vries RP (2014) Plant biomass degradation by fungi. *Fungal*
- 444 *Genet Biol* 72:2-9.
- 445 3. Rasmann S, Bennett A, Biere A, Karley A, & Guerrieri E (2017) Root symbionts: Powerful
- 446 drivers of plant above- and belowground indirect defenses. *Insect Sci* 24(6):947-960.
- 447 4. Bischof RH, Ramoni J, & Seiboth B (2016) Cellulases and beyond: the first 70 years of the
- 448 enzyme producer *Trichoderma reesei*. *Microb Cell Fact* 15(1):106.
- 449 5. Guzman-Guzman P, Porrás-Troncoso MD, Olmedo-Monfil V, & Herrera-Estrella A (2019)
- 450 *Trichoderma* species: Versatile plant symbionts. *Phytopathology* 109(1):6-16.
- 451 6. Martínez D, *et al.* (2008) Genome sequencing and analysis of the biomass-degrading fungus
- 452 *Trichoderma reesei* (syn. *Hypocrea jecorina*). *Nat Biotechnol* 26(5):553-560.
- 453 7. Schmoll M, *et al.* (2016) The genomes of three uneven siblings: footprints of the lifestyles of
- 454 three *Trichoderma* species. *Microbiol Mol Biol Rev* 80(1):205-327.
- 455 8. Schmoll M, Seiboth B, Druzhinina I, & Kubicek CP (2014) Genomics analysis of biocontrol
- 456 species and industrial enzyme producers from the genus *Trichoderma*. *The Mycota XIII*, eds Esser
- 457 K & Nowrousian M (Springer, Berlin), pp 233-266.
- 458 9. Seidl V, *et al.* (2006) Antagonism of *Pythium* blight of zucchini by *Hypocrea jecorina* does not
- 459 require cellulase gene expression but is improved by carbon catabolite derepression. *FEMS*
- 460 *Microbiol Lett* 257(1):145-151.
- 461 10. Seidl V, Seibel C, Kubicek CP, & Schmoll M (2009) Sexual development in the industrial
- 462 workhorse *Trichoderma reesei*. *Proc Natl Acad Sci U S A* 106(33):13909-13914.
- 463 11. Hinterdobler W, Beier S, S. K, & Schmoll M (2020) Sexual development, its determinants and
- 464 regulation in *Trichoderma reesei*. *Recent Developments in Trichoderma Research*, New and
- 465 future developments in microbial biotechnology and bioengineering, eds Zeilinger S, Druzhinina
- 466 I, Singh HB, & Gupta VK (Elsevier, Amsterdam, The Netherlands), pp 185-206.
- 467 12. Hinterdobler W, *et al.* (2021) *Trichoderma reesei* isolated from Austrian soil with high potential
- 468 for biotechnological application. *Front Microbiol* 12:552301.
- 469 13. Glass NL, Schmoll M, Cate JH, & Coradetti S (2013) Plant cell wall deconstruction by
- 470 ascomycete fungi. *Annu Rev Microbiol* 67:477-498.
- 471 14. Schmoll M (2018) Regulation of plant cell wall degradation by light in *Trichoderma*. *Fungal Biol*
- 472 *Biotechnol* 5:10.
- 473 15. Foreman PK, *et al.* (2003) Transcriptional regulation of biomass-degrading enzymes in the
- 474 filamentous fungus *Trichoderma reesei*. *J Biol Chem* 278(34):31988-31997.
- 475 16. Bazafkan H, Tisch D, & Schmoll M (2014) Regulation of glycoside hydrolase expression in
- 476 *Trichoderma*. *Biotechnology and Biology of Trichoderma*, eds Gupta VK, Schmoll M, Herrera-
- 477 Estrella A, Upadhyay RS, Druzhinina I, & Tuohy MG (Elsevier, Oxford, UK), pp 291-307.
- 478 17. Strauss J, *et al.* (1995) Cre1, the carbon catabolite repressor protein from *Trichoderma reesei*.
- 479 *FEBS Lett* 376(1-2):103-107.
- 480 18. Adnan M, *et al.* (2017) Carbon catabolite repression in filamentous fungi. *Int J Mol Sci* 19(1).
- 481 19. Schmoll M, Schuster A, do Nascimento Silva R, & Kubicek CP (2009) The G-alpha protein
- 482 GNA3 of *Hypocrea jecorina* (anamorph *Trichoderma reesei*) regulates cellulase gene expression
- 483 in the presence of light. *Eukaryot Cell* 8(3):410 - 420.

- 484 20. Seibel C, *et al.* (2009) Light-dependent roles of the G-protein subunit GNA1 of *Hypocrea*  
485 *jecorina* (anamorph *Trichoderma reesei*). *BMC Biol* 7(1):58.
- 486 21. Tisch D, Kubicek CP, & Schmoll M (2011) The phosducin-like protein PhLP1 impacts regulation  
487 of glycoside hydrolases and light response in *Trichoderma reesei*. *BMC Genomics* 12:613.
- 488 22. Schuster A, Tisch D, Seidl-Seiboth V, Kubicek CP, & Schmoll M (2012) Roles of protein kinase  
489 A and adenylate cyclase in light-modulated cellulase regulation in *Trichoderma reesei*. *Appl*  
490 *Environ Microbiol* 78(7):2168-2178.
- 491 23. Sestak S & Farkas V (1993) Metabolic regulation of endoglucanase synthesis in *Trichoderma*  
492 *reesei*: participation of cyclic AMP and glucose-6-phosphate. *Can J Microbiol* 39(3):342-347.
- 493 24. Stappler E, Dattenböck C, Tisch D, & Schmoll M (2017) Analysis of light- and carbon-specific  
494 transcriptomes implicates a class of G-protein-coupled receptors in cellulose sensing. *mSphere*  
495 2(3):e00089-00017.
- 496 25. Brand A & Gow NA (2009) Mechanisms of hypha orientation of fungi. *Curr Opin Microbiol*  
497 12(4):350-357.
- 498 26. Turra D, Nordzike D, Vitale S, El Ghalid M, & Di Pietro A (2016) Hyphal chemotropism in  
499 fungal pathogenicity. *Semin Cell Dev Biol* 57:69-75.
- 500 27. Turra D, El Ghalid M, Rossi F, & Di Pietro A (2015) Fungal pathogen uses sex pheromone  
501 receptor for chemotropic sensing of host plant signals. *Nature* 527(7579):521-524.
- 502 28. Nordzike DE, Fernandes TR, El Ghalid M, Turra D, & Di Pietro A (2019) NADPH oxidase  
503 regulates chemotropic growth of the fungal pathogen *Fusarium oxysporum* towards the host plant.  
504 *New Phytol* 224(4):1600-1612.
- 505 29. Lombardi N, *et al.* (2018) Root exudates of stressed plants stimulate and attract *Trichoderma* soil  
506 fungi. *Mol Plant Microbe Interact*.
- 507 30. Vitale S, Di Pietro A, & Turra D (2019) Autocrine pheromone signalling regulates community  
508 behaviour in the fungal pathogen *Fusarium oxysporum*. *Nat Microbiol* 4(9):1443-1449.
- 509 31. Vitale S, *et al.* (2017) Structure-activity relationship of alpha mating pheromone from the fungal  
510 pathogen *Fusarium oxysporum*. *J Biol Chem* 292(9):3591-3602.
- 511 32. Margolles-Clark E, Ilmén M, & Penttilä M (1997) Expression patterns of ten hemicellulase genes  
512 of the filamentous fungus *Trichoderma reesei* on various carbon sources. *J Biotechnol* 57:167-  
513 179.
- 514 33. Cortes C, *et al.* (1998) The expression of genes involved in parasitism by *Trichoderma harzianum*  
515 is triggered by a diffusible factor. *Mol Gen Genet* 260(2-3):218-225.
- 516 34. Elad Y, Chet I, Boyle P, & Henis Y (1983) Parasitism of *Trichoderma* spp. on *Rhizoctonia solani*  
517 and *Sclerotium rolfisii* - Scanning Electron Microscopy and Fluorescence Microscopy.  
518 *Phytopathology* 73(1):85-88.
- 519 35. Debuchy R, Berteaux-Lecellier V, & Silar P (2010) Mating systems and sexual morphogenesis in  
520 ascomycetes. *Cellular and Molecular Biology of Filamentous Fungi*, eds Borkovich KA & Ebbole  
521 DJ (ASM Press, Washington, DC), pp 501 - 535.
- 522 36. Bazafkan H, *et al.* (2015) Mating type dependent partner sensing as mediated by VEL1 in  
523 *Trichoderma reesei*. *Mol Microbiol* 96(6):1103-1118.
- 524 37. Seibel C, Tisch D, Kubicek CP, & Schmoll M (2012) The role of pheromone receptors for  
525 communication and mating in *Hypocrea jecorina* (*Trichoderma reesei*). *Fungal Genet Biol*  
526 49(10):814-824.
- 527 38. Jekosch K & Kück U (2000) Glucose dependent transcriptional expression of the *cre1* gene in  
528 *Acremonium chrysogenum* strains showing different levels of cephalosporin C production. *Curr*  
529 *Genet* 37(6):388-395.
- 530 39. Lichius A, Seidl-Seiboth V, Seiboth B, & Kubicek CP (2014) Nucleo-cytoplasmic shuttling  
531 dynamics of the transcriptional regulators XYR1 and CRE1 under conditions of cellulase and  
532 xylanase gene expression in *Trichoderma reesei*. *Mol Microbiol*.
- 533 40. Nakari-Setälä T, *et al.* (2009) Genetic modification of carbon catabolite repression in  
534 *Trichoderma reesei* for improved protein production. *Appl Environ Microbiol* 75(14):4853-4860.

- 535 41. Arvas M, *et al.* (2011) Correlation of gene expression and protein production rate - a system wide  
536 study. *BMC Genomics* 12:616.
- 537 42. Rassinger A, Gacek-Matthews A, Strauss J, Mach RL, & Mach-Aigner AR (2018) Truncation of  
538 the transcriptional repressor protein Cre1 in *Trichoderma reesei* Rut-C30 turns it into an activator.  
539 *Fungal Biol Biotechnol* 5:15.
- 540 43. Conrad M, *et al.* (2014) Nutrient sensing and signaling in the yeast *Saccharomyces cerevisiae*.  
541 *FEMS Microbiol Rev* 38(2):254-299.
- 542 44. Van Ende M, Wijnants S, & Van Dijck P (2019) Sugar sensing and signaling in *Candida albicans*  
543 and *Candida glabrata*. *Front Microbiol* 10:99.
- 544 45. Timotiwu PB & Sakurai N (2002) Identification of mono-, oligo-, and polysaccharides secreted  
545 from soybean roots. *J Plant Res* 115(1118):77-85.
- 546 46. Hermosa R, Viterbo A, Chet I, & Monte E (2012) Plant-beneficial effects of *Trichoderma* and of  
547 its genes. *Microbiology-Sgm* 158:17-25.
- 548 47. Vargas WA, Mandawe JC, & Kenerley CM (2009) Plant-derived sucrose is a key element in the  
549 symbiotic association between *Trichoderma virens* and maize plants. *Plant Physiol* 151(2):792-  
550 808.
- 551 48. Bever JD, Richardson SC, Lawrence BM, Holmes J, & Watson M (2009) Preferential allocation  
552 to beneficial symbiont with spatial structure maintains mycorrhizal mutualism. *Ecol Lett* 12(1):13-  
553 21.
- 554 49. Werner GD & Kiers ET (2015) Partner selection in the mycorrhizal mutualism. *New Phytol*  
555 205(4):1437-1442.
- 556 50. Vitikainen M, *et al.* (2010) Array comparative genomic hybridization analysis of *Trichoderma*  
557 *reesei* strains with enhanced cellulase production properties. *BMC Genomics* 11:441.
- 558 51. Gruber F, Visser J, Kubicek CP, & de Graaff LH (1990) The development of a heterologous  
559 transformation system for the cellulolytic fungus *Trichoderma reesei* based on a *pyrG*-negative  
560 mutant strain. *Curr Genet* 18(1):71-76.
- 561 52. Tisch D, *et al.* (2017) Omics Analyses of *Trichoderma reesei* CBS999.97 and QM6a indicate the  
562 relevance of female fertility to carbohydrate-active enzyme and transporter levels. *Appl Environ*  
563 *Microbiol* 83(22).
- 564 53. Schuster A, *et al.* (2012) A versatile toolkit for high throughput functional genomics with  
565 *Trichoderma reesei*. *Biotechnol Biofuels* 5(1):1.
- 566 54. Tronsmo A (1991) Biological and integrated controls of *Botrytis cinerea* on apple by *Trichoderma*  
567 *harzianum*. *Biological Control* 1(1):59-62.
- 568 55. Schmoll M (2013) Sexual development in *Trichoderma* - scrutinizing the aspired phenomenon.  
569 *Trichoderma: Biology and Applications*, eds Mukherjee PK, Horwitz BA, Singh US, Mukherjee  
570 M, & Schmoll M (CAB International, UK), pp 67-86.
- 571 56. Hinterdobler W, *et al.* (2019) The role of PKAc1 in gene regulation and trichodimerol production  
572 in *Trichoderma reesei*. *Fungal Biol Biotechnol* 6:12.
- 573

574 **Figures**

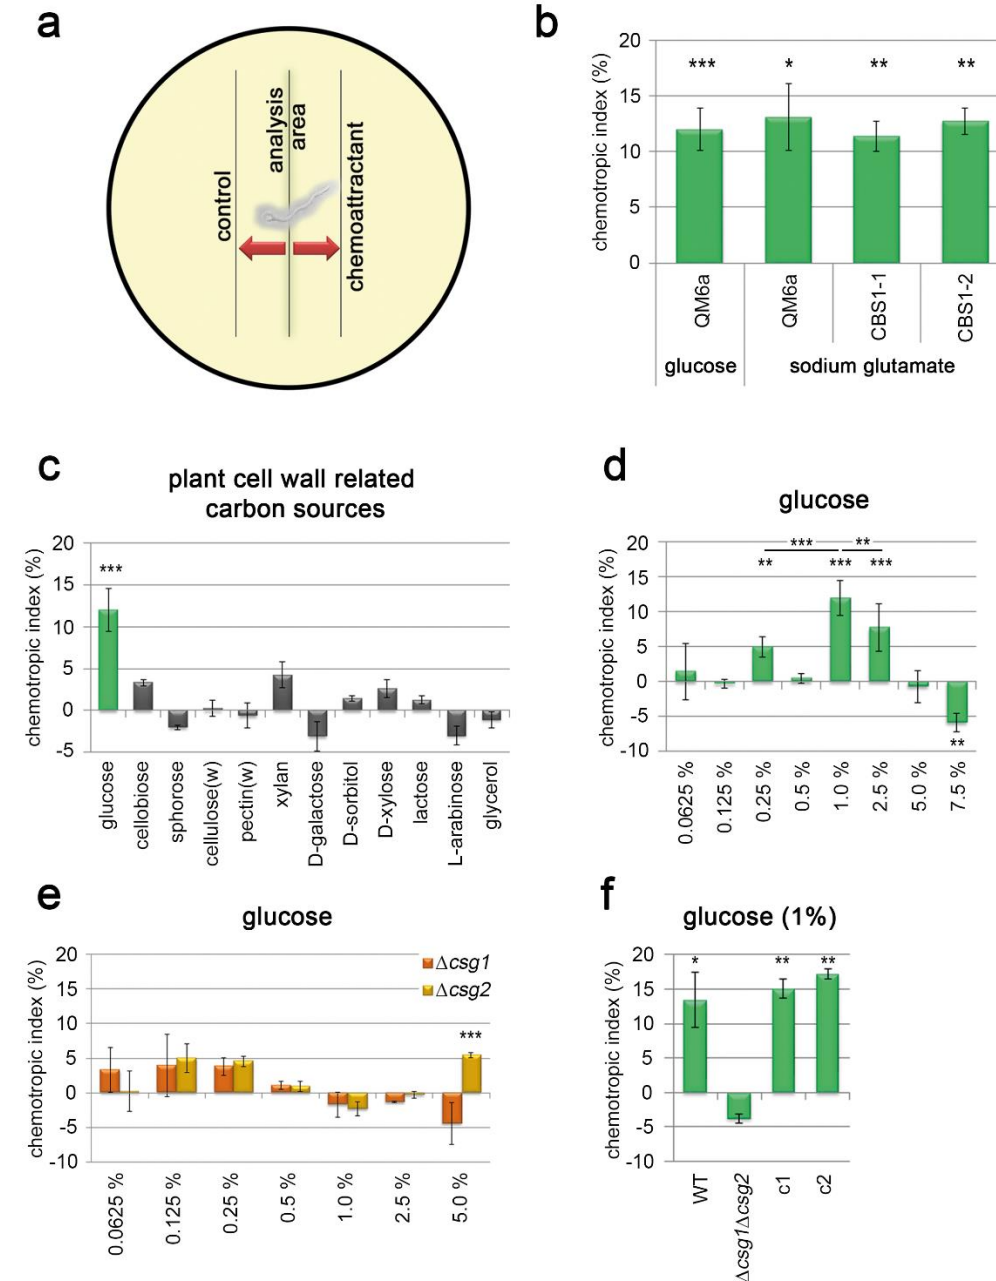

575  
 576 **Figure 1. *T. reesei* responds chemotropically to nutrients.** (a) Schematic representation of the  
 577 experimental setup for analysis of chemotropic responses. (b) Chemotropic response of different *T. reesei*  
 578 wild type strains to 1 % glucose or 5 % sodium glutamate. (c) Chemotropic response of wild type strain  
 579 QM6a to different carbon sources related to degradation of plant biomass. Soluble carbon sources were used  
 580 at 55 mM corresponding to 1 % glucose, cellulose and pectin were used at 1 % and washed ("w") after  
 581 autoclaving prior to application. (d, e) Chemotropic response of QM6a (d) or the G protein-coupled receptor  
 582 mutants  $\Delta csg1$  and  $\Delta csg2$  (e) to different glucose concentrations. (f) Chemotropic response of a  $\Delta csg1\Delta csg2$   
 583 double mutant and two progeny from the crossings of QM6a $\Delta csg1$  and QM6a $\Delta csg2$  with FF1, in which  
 584 these deletions are restored (c1 and c2). Error bars show standard deviations from at least two biological  
 585 replicates. Asterisks mark statistical significance of chemotropism in comparison to the control (absence of a  
 586 chemoattractant). Statistical significance between tested strains or concentrations is indicated by asterisks  
 587 over black bars. \* p-value < 0.1, \*\* p-value < 0.05 and \*\*\* p-value < 0.01.

588

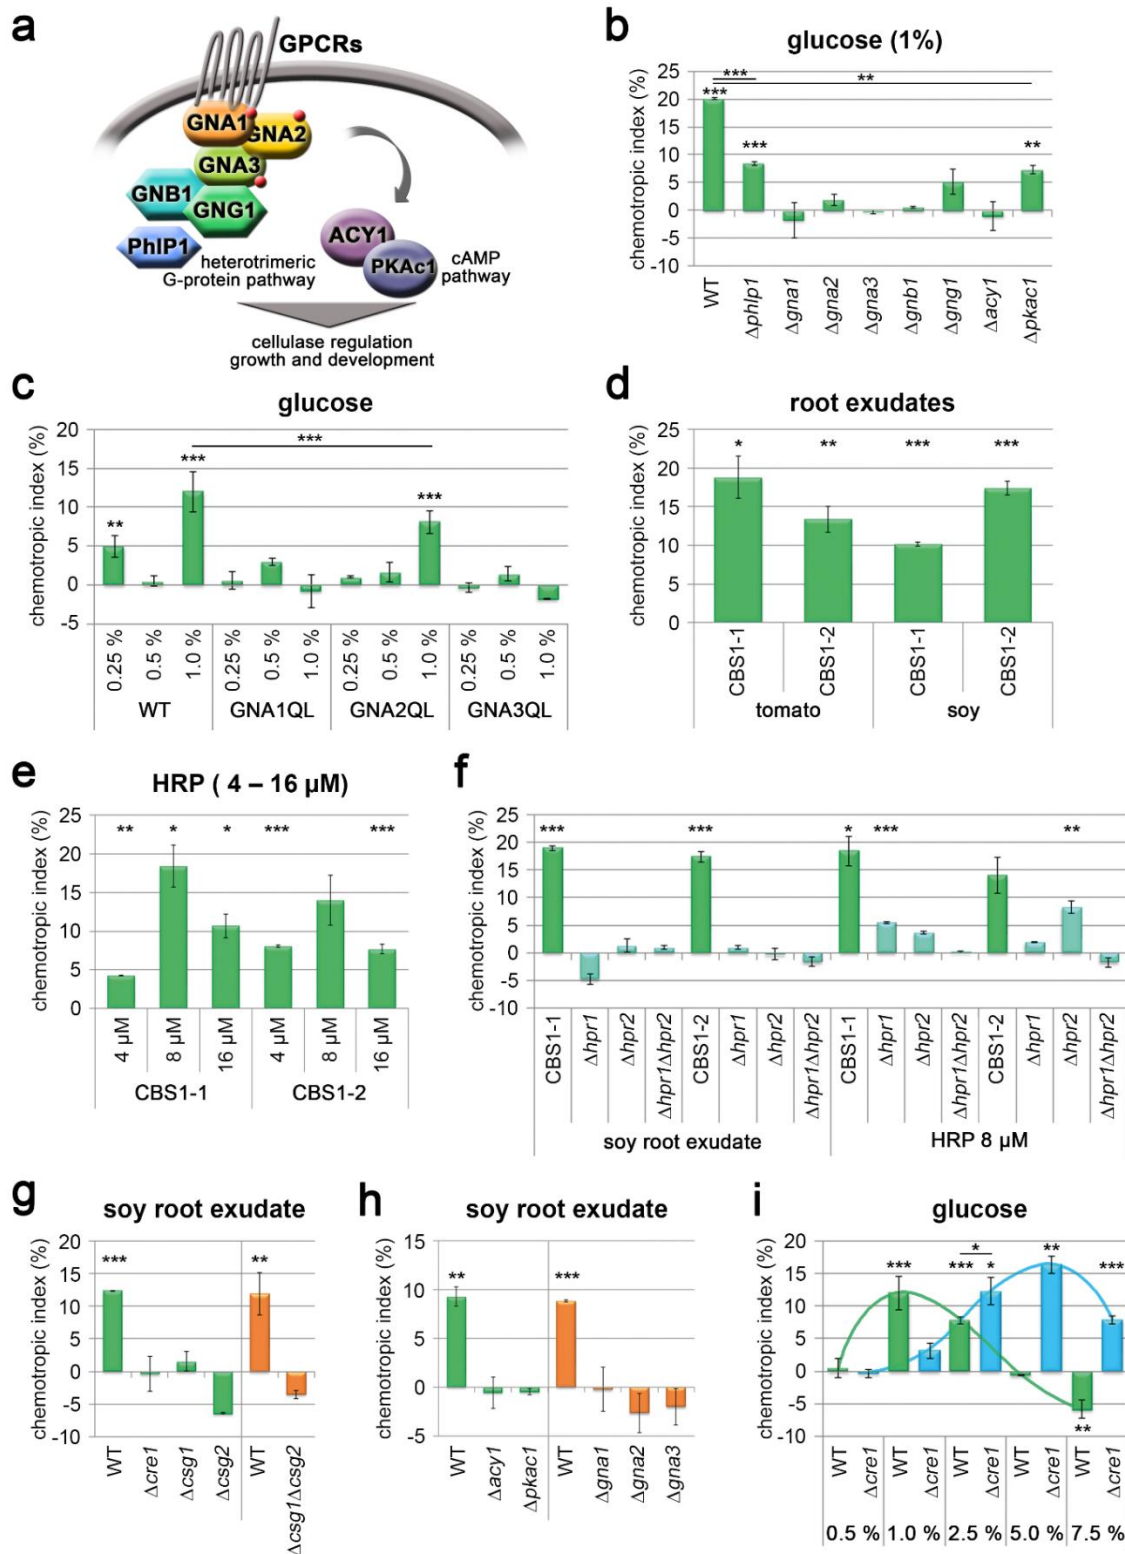

589

590

591

592

593

**Figure 2. Glucose chemosensing requires the GPCRs CSG1/CSG2, heterotrimeric G proteins and the cAMP/PKA pathway.** (a) Schematic representation of the heterotrimeric G protein-PKA/cAMP pathway in *T. reesei*. (b) Chemotactic response to 1 % glucose of deletion mutants lacking the phosphatidylinositol 3-kinase PHLIP1, G alpha (GNA1/2/3), beta (GNB1) or gamma (GNG1) subunits, the adenylate cyclase ACY1 or the catalytic

594 subunit 1 of protein kinase A (PKAc1). **(c)** Chemotropic response to different glucose concentrations of  
595 strains carrying dominant activating alleles of the G protein alpha subunits GNA1, 2 or 3. **(d)** Chemotropic  
596 response to root exudates of tomato or soybean plants, of the fully fertile strains CBS 999.97 MAT1-1  
597 (CBS1-1) and CBS999.97 MAT1-2 (CBS1-2). **(e)** Chemotropic response to different concentrations of  
598 horse radish peroxidase (HRP) of CBS1-1 and CBS1-2. **(f)** Chemotropic response to soy root exudate or  
599 8 $\mu$ M HRP, of CBS1-1 or CBS1-2 or the single and double pheromone receptor deletion mutants derived  
600 from these strains. **(g)** Chemotropic response to soy root exudate of deletion mutants lacking *cre1*, *csg1*  
601 and/or *csg2*. **(h)** Chemotropic response to soy root exudate of deletion mutants lacking the indicated G alpha  
602 subunits, adenylate cyclase (ACY1) or the catalytic subunit 1 of protein kinase A (PKAc1). **(i)** Chemotropic  
603 response to different glucose concentrations of the wild type and the  $\Delta cre1$  mutant. Error bars show standard  
604 deviations from at least two biological replicates. Asterisks mark statistical significance of chemotropism  
605 in comparison to the control (absence of a chemoattractant). Statistical significance between measurements  
606 is indicated by asterisks over black bars. \* p-value < 0.1, \*\* p-value < 0.05 and \*\*\* p-value < 0.01.  
607

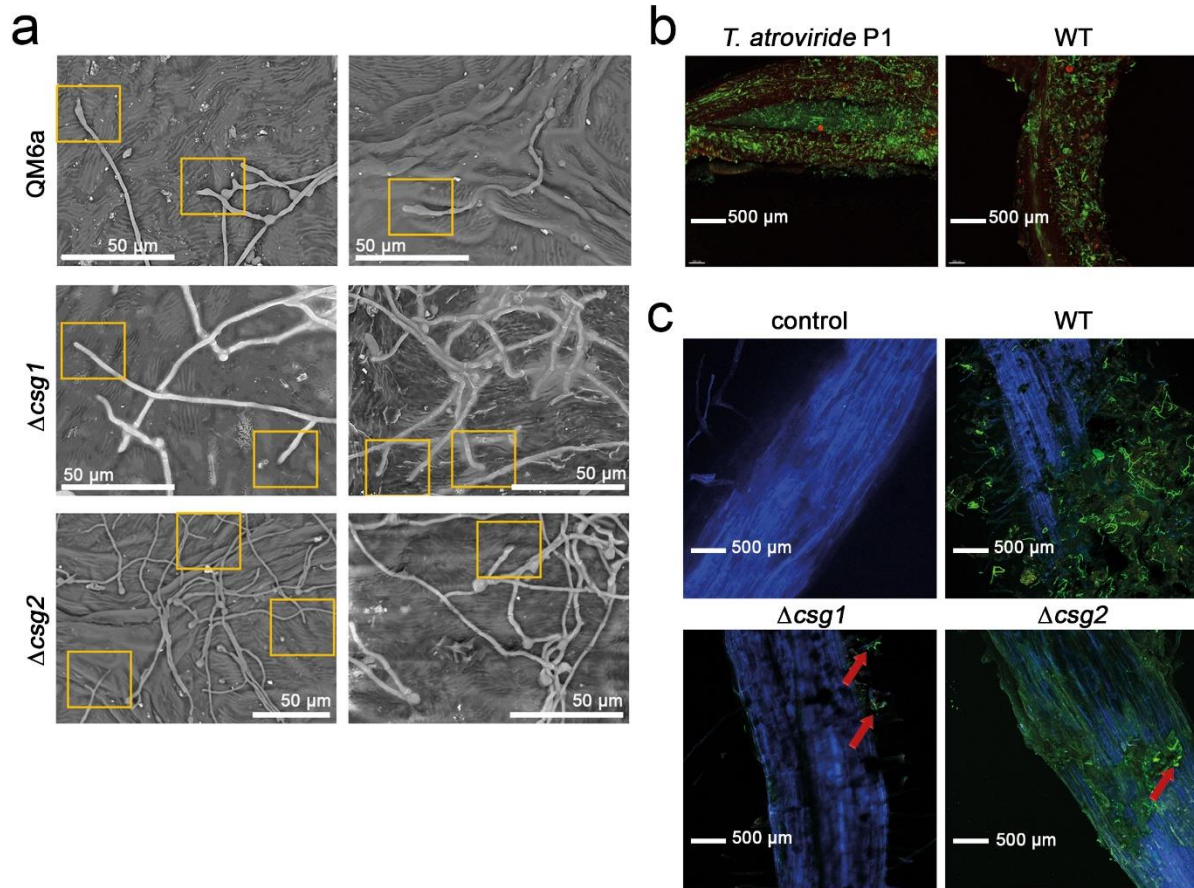

608  
609 **Figure 3. CSG1/CSG2 are required for developmental responses to plant surfaces.** (a) Scanning  
610 electron microscopy analysis of interactions of QM6a and the receptor mutants  $\Delta csg1$  and  $\Delta csg2$  to a surface  
611 sterilized maple leaf. Yellow boxes indicate morphological alterations of hyphal tips in the wild type that  
612 are not observed in the deletion strains. (b) Confocal microscopy analysis of colonization of soybean roots  
613 by *T. atroviride* or *T. reesei* QM6a (WT). (c) Colonization of soybean roots by QM6a,  $\Delta csg1$  or  $\Delta csg2$ . An  
614 uninoculated root is shown as control.



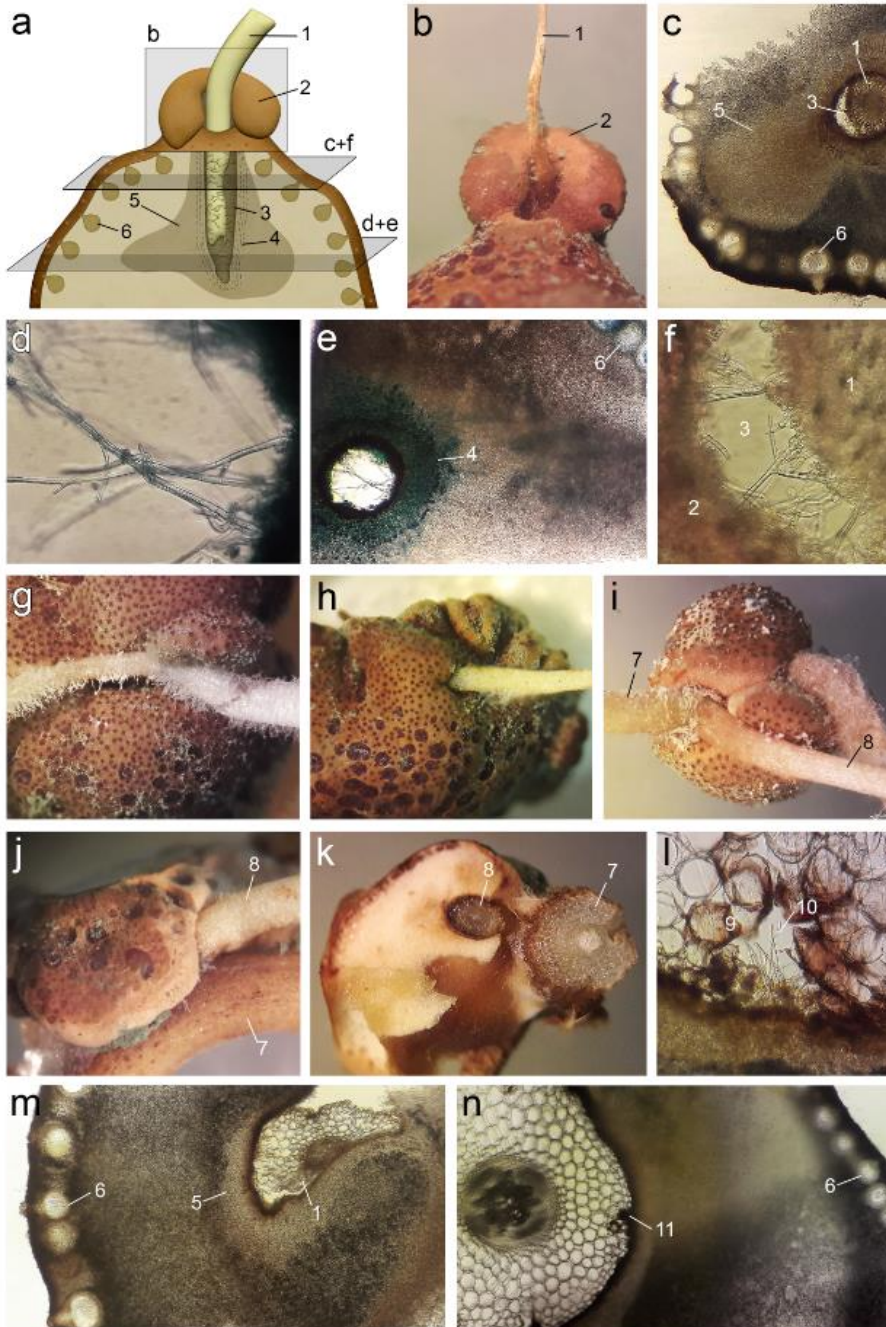

615  
 616 **Figure 4. Fruiting bodies physically interact with soybean roots.** (a) Schematic representation of the  
 617 cross-sections through a fruiting body (FB) enclosing a soybean root [1]. Highlighted in grey are the  
 618 macroscopic view of the entering zone (b), and two cross-sections (c) and (e) (200x) with the corresponding  
 619 magnifications (d) and (f) (400x); Perithecia [6], zone in the FB showing a response to the soy root [5],  
 620 methylene blue-stained pattern [4] and the cavity remaining after root tissue degradation [3]. (b) Example  
 621 of a FB forming additional tissue [2] as reaction to the presence of the plant root [1]. (g–i) Macroscopic  
 622 interaction between FB and roots; primary [7] and secondary roots [8]. (j and k) FB grown on the branching  
 623 area of primary [7] and secondary root [8]. (l) Hyphae entering the root tissue [10] with root cells reacting  
 624 to the fungus [9] are shown. (m and n) Cross-sections through FBs growing around roots with an entering  
 625 point of mycelium [11] into the root tissue. Photos (b, g–j, m and n) are composed of several merged pictures  
 626 (focus stacking) for better depth of focus and in case of (m) and (n) for a broader overview of the whole  
 627 cross-section.

628

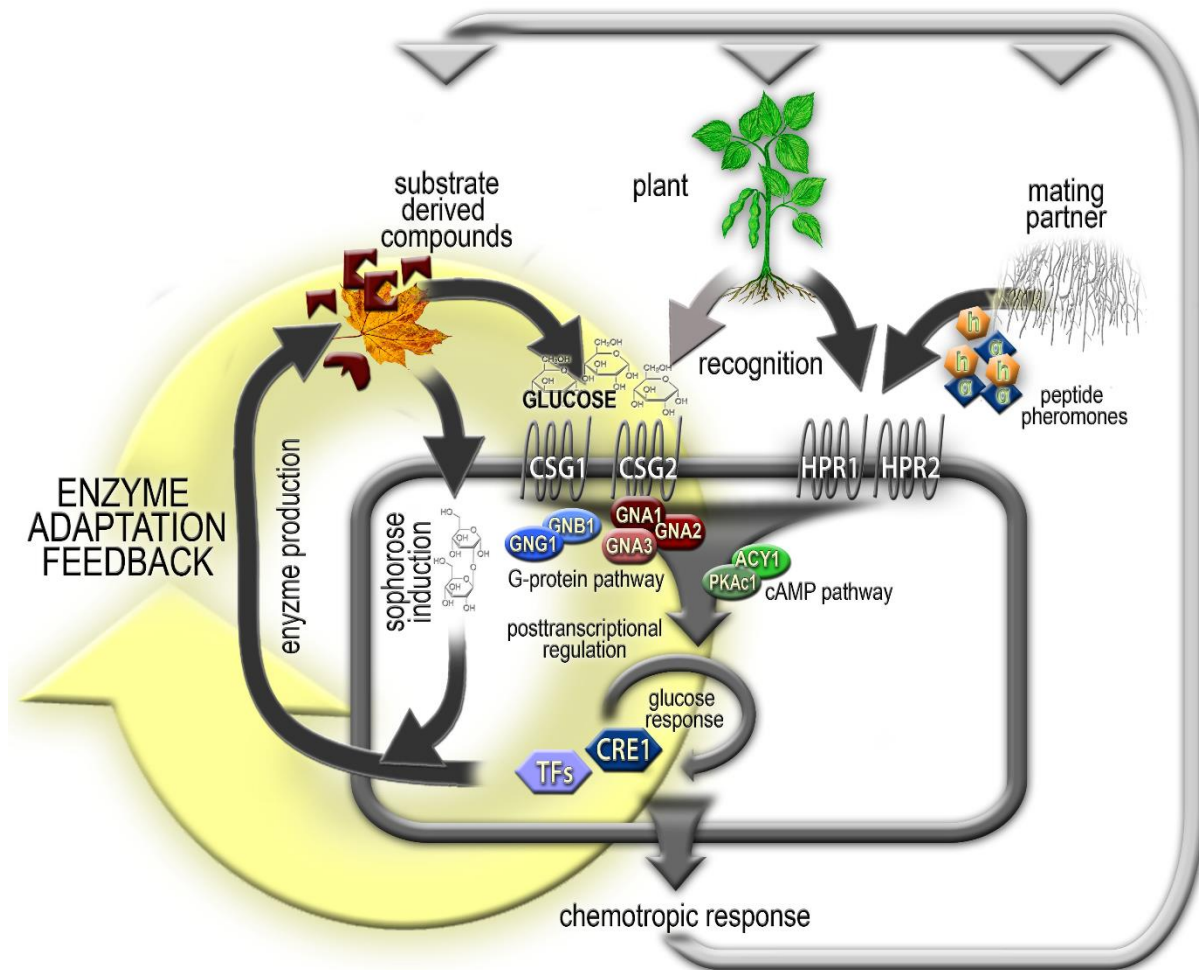

629

630

631 **Figure 5. Integrative model of nutrient, plant and mating partner chemosensing in *T. reesei*.**

632 Transcription of genes encoding plant cell wall degrading enzymes (CWDEs) is triggered by the natural

633 inducer sophorose. Moreover, CWDE biosynthesis beyond basal levels is initiated in response to defined

634 levels of glucose liberated by enzymatic cleavage from plant biomass, requires the glucose sensor GPCRs

635 CSG1/CSG2 and the heterotrimeric G protein-cAMP/PKA pathway and is negatively regulated by the

636 carbon catabolite repressor CRE1 in response to high glucose levels. Proper nutrient sensing further results

637 in morphogenetic responses and successful root colonization. Together these regulated pathways (enzyme

638 secretion, glucose sensing, carbon catabolite repression and plant sensing) constitute an adaptation feedback

639 loop which is used to distinguish between dead plant biomass (enzymatic degradation and glucose levels

640 balanced) and living plants (enzymatic degradation not required for glucose liberation, no balance). The

641 heterotrimeric G protein pathway integrates nutrient, plant and mating signals. Accordingly, transmission

642 of nutrient signals by CSG1, CSG2 and CRE1 is required for proper plant recognition and sexual

643 development is accelerated upon communication with the plant.

644
